# Supplementary material for: Radiopharmaceutical-activated silicon naphthalocyanine nanoparticles towards tumor photodynamic therapy
Source: Royal Society of Chemistry journal article supplement (doi:10.1039/d4cc03281k), 2024-01-01
Supplement: d4cc03281k1.pdf [file d4cc03281k1.pdf]

## Supporting Information

### **Radiopharmaceutical-Activated Silicon Naphthalocyanine Nanoparticles towards Tumor Photodynamic Therapy**

Tingting Wang,<sup>#a</sup> Jingchao Li,<sup>#b</sup> Xun Zhang,<sup>a</sup> Chengao Li,<sup>c</sup> Jiang Ming,<sup>d</sup> Dongsheng Zhang,<sup>a</sup> Jian Li,<sup>a</sup> Jun Yang,<sup>a</sup> Nian Liu,<sup>\*a</sup> and Xinhui Su<sup>\*a</sup>

<sup>a</sup> Department of Nuclear Medicine, The First Affiliated Hospital, Zhejiang University School of Medicine, Hangzhou 310003, China

<sup>b</sup> Department of Nuclear Medicine, Daping Hospital, Army Medical University, Chongqing 400042, China

<sup>c</sup> State Key Laboratory of Silicon Materials, School of Materials Science and Engineering, Zhejiang University, Hangzhou 310058, China

<sup>d</sup> Department of Chemistry, Xiamen University, Xiamen 361005, China

# T. Wang and J. Li contributed equally to this work.

The file includes:

Experimental Section

Figure S1. UV-Vis-NIR absorption spectrum of SiNc NPs dispersed in saline and in physiological conditions (the water containing 10% fetal bovine serum) for 15 days.

Figure S2. Quantitative analysis of luminescent intensity of <sup>18</sup>F-FDG and <sup>18</sup>F-FDG + SiNc NPs.

Figure S3. Fluorescence intensity in tumor sites at different time-point post-injection.

Figure S4. *Ex vivo* fluorescence imaging of major health organs and tumors at 24 h post-injection.

Figure S5. Fluorescence imaging of feces and urine which collected at 2 h, 4 h and 6 h post-injection.

Figure S6. The survival rate curves of mice in various treatment group.

Figure S7. H&E staining images of major health tissues including heart, liver, spleen, lung and kidney of mice in each therapeutic group (Scale bar = 50 μm).

## **Experimental procedures**

### **Synthesis of SiNc NPs**

Silicon naphthalocyanine nanoparticles (SiNc NPs) were prepared *via* solvent evaporating method. Firstly, SiNc (0.6 mg) and methoxy poly(ethylene glycol)-*b*-poly( $\epsilon$ -caprolactone) (PEG–PCL, 20 mg) were dissolved in 2 mL of tetrahydrofuran (THF). The solution was transferred into 25 mL round-bottom flask, and 4 mL deionized water was added. THF was removed under vacuum using rotary evaporator. The three-stage evaporation cycle was operated as previous report. The final volume of obtained samples was adjusted to 1 mL with saline.

### **Characterization of SiNc NPs**

The transmission electron microscopy images of SiNc NPs were acquired using JEOL JEM-F200. UV-Vis-NIR spectrum of SiNc NPs was recorded on the Cary 5000 Scan UV-Vis-NIR spectrophotometer.

### **The detection of $^1\text{O}_2$**

Singlet oxygen sensor green (SOSG) probe was utilized for the detection of  $^1\text{O}_2$  on multimode reader (SpectraMax i3x). Firstly, SOSG (100  $\mu\text{g}$ ) was dissolved in the methanol (330  $\mu\text{L}$ ) to form the mother solution (0.5 mM). Then, 30  $\mu\text{L}$  mother solution of SOSG was added into the saline and saline +  $^{18}\text{F}$ -FDG to acquire their fluorescence intensity ( $E_x = 504 \text{ nm}$ ,  $E_m = 525 \text{ nm}$ ) as  $F_0$  and  $F$  values, respectively. Finally, 30  $\mu\text{L}$  mother solution of SOSG was added into SiNc NPs and SiNc NPs +  $^{18}\text{F}$ -FDG to obtain their fluorescence intensity ( $E_x = 504 \text{ nm}$ ,  $E_m = 525 \text{ nm}$ ) as  $F_0$  and  $F$  values, respectively. The ability of SiNc NPs for generating  $^1\text{O}_2$  under the CR activation was identified by comparing the  $F/F_0$  value in saline group and SiNc NPs group.

### **Cytotoxicity assay**

The cytotoxicity assay of SiNc NPs was measured by cell counting kit-8 (CCK8) assay. Firstly, 4T1 cells were cultured at 37 °C in RPMI 1640 medium containing 10% fetal bovine serum (FBS), penicillin (100 U  $\text{mL}^{-1}$ ) and streptomycin (100  $\mu\text{g mL}^{-1}$ ). After adding SiNc NPs solution with increasing concentrations and co-cultured for 24 h, 80  $\mu\text{L}$  medium containing 4  $\mu\text{g}$  CCK8 reagent was added to each well. Then, this cell-

culturing plate was incubated at 37 °C for 1 h and subsequently being slowly shaken for 15 min. Finally, the cytotoxicity of the SiNc NPs was detected by measuring the absorbance of each well at 450 nm on multimode reader.

Cell-level therapeutic effect of SiNc NPs-based CR-PDT was also evaluated by CCK8 assay as above, replacing the cell co-cultured samples with  $^{18}\text{F}$ -FDG (200  $\mu\text{Ci}$ ), SiNc NPs (100 ppm) or  $^{18}\text{F}$ -FDG (100  $\mu\text{Ci}$  or 200  $\mu\text{Ci}$ ) + SiNc NPs (100 ppm).

### **Construction of tumor models**

All animal experiments complied with the relevant regulations of the Animal Care and Use Committee of the First Affiliated Hospital of Zhejiang University School of Medicine (No. 2023-986). The 4T1 subcutaneous tumor models were performed by subcutaneous injection of 60  $\mu\text{L}$  cell culture medium without serum containing  $1 \times 10^6$  4T1 cancer cells on the right rear legs of mice. After the inoculation for 6 days, the tumor with the size of around 60  $\text{mm}^3 \sim 80 \text{mm}^3$  could be used for the living fluorescence imaging and *in vivo* treatment.

### **Living fluorescence imaging**

4T1 subcutaneous tumor-bearing mice ( $n = 3$ ) were intravenously injected with SiNc NPs solution (100  $\mu\text{L}$ , 0.5  $\text{mg mL}^{-1}$ ). At 2 h, 4 h, 8 h, 12 h and 24 h post-injection of SiNc, the mice were subjected to living fluorescence imaging using IVIS Lumina II imaging system (Caliper Life Science, USA). The acquired data were processed using the Living Image 4.5 Software.

### **PET imaging**

4T1 subcutaneous tumor-bearing mice ( $n = 3$ ) were intravenously injected with clinically used  $^{18}\text{F}$ -FDG (50  $\mu\text{L}$ , 100  $\mu\text{Ci}$ ) which was provided by the first affiliated hospital of school of medicine of Zhejiang university. At 60 min post-injection, the mice were subjected to PET imaging (Inveon scanner (Siemens, USA)), the acquired data was edited using the built-in software of the instrument.

### ***In vivo* antitumor treatment**

4T1 subcutaneous tumor-bearing mice were divided into 4 groups ( $n = 5$ ): Saline (control),  $^{18}\text{F}$ -FDG, SiNc NPs and SiNc NPs +  $^{18}\text{F}$ -FDG (CR-PDT). Taking CR-PDT group for example, firstly, SiNc NPs (200  $\mu\text{L}$ , 0.5  $\text{mg/mL}$ ) was intravenously injected

into the mice. At 12 h post-injection of SiNc NPs,  $^{18}\text{F}$ -FDG (100  $\mu\text{L}$ , 800  $\mu\text{Ci}$ ) was intravenously injected into the mice to activate tumor accumulated SiNc NPs (first-round treatment). At day 3, the administrations of SiNc NPs and  $^{18}\text{F}$ -FDG were repeatedly operated as above for second-round treatment. The mice in  $^{18}\text{F}$ -FDG group or SiNc NPs group were only intravenously injected with  $^{18}\text{F}$ -FDG or SiNc NPs for two rounds. The volume of tumors and the weights of mice were measured per 2 days. The mouse model whose tumor exceeded 800  $\text{mm}^3$  would be recorded as death.

### **Statistical analysis**

All the data were presented as the mean ( $\pm$ ) standard deviation (SD). The statistical analyses were conducted and plotted using OriginPro 2023b software. Asterisks represented the significant differences (\* $P < 0.05$ , \*\* $P < 0.01$  and \*\*\* $P < 0.001$ ).

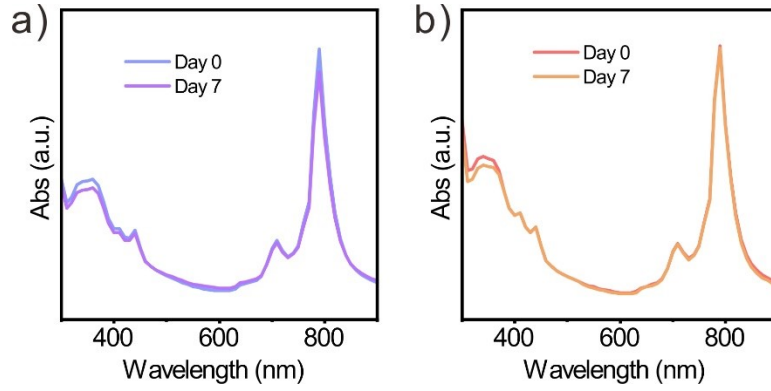

Figure S1: UV-Vis-NIR absorption spectrum of SiNc NPs dispersed in saline and in water containing 10% fetal bovine serum for 7 days.

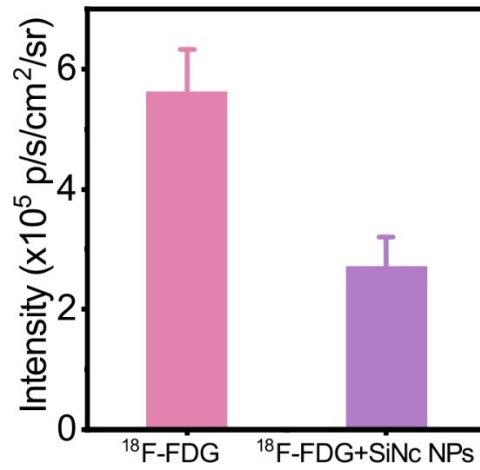

Figure S2: Quantitative analysis of luminescent intensity of <sup>18</sup>F-FDG and <sup>18</sup>F-FDG + SiNc NPs.

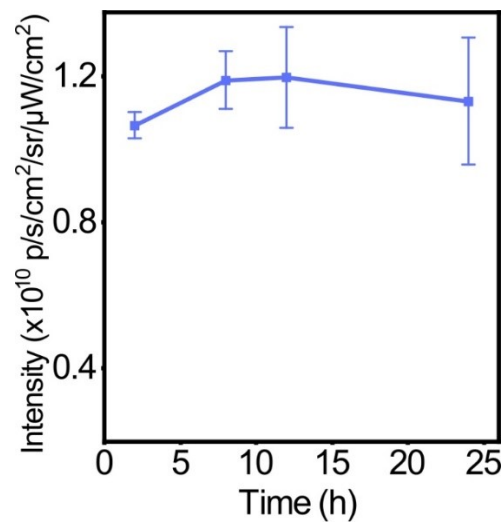

Figure S3: Fluorescence intensity in tumor sites at different time-point post-injection.

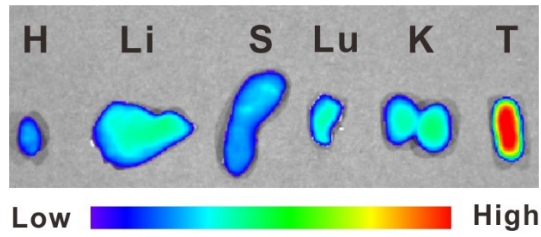

Figure S4: *Ex vivo* fluorescence imaging of major health organs and tumors at 24 h post-injection.

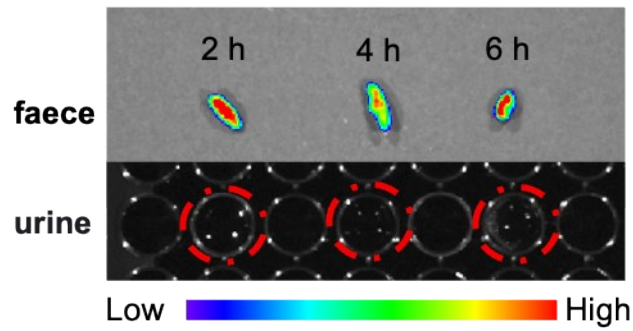

Figure S5: Fluorescence imaging of faeces and urine which collected at 2 h, 4 h and 6 h post-injection of SiNc NPs.

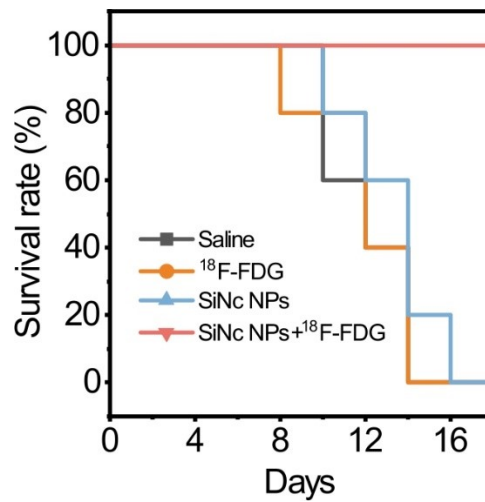

Figure S6: The survival rate curves of mice in various treatment group.

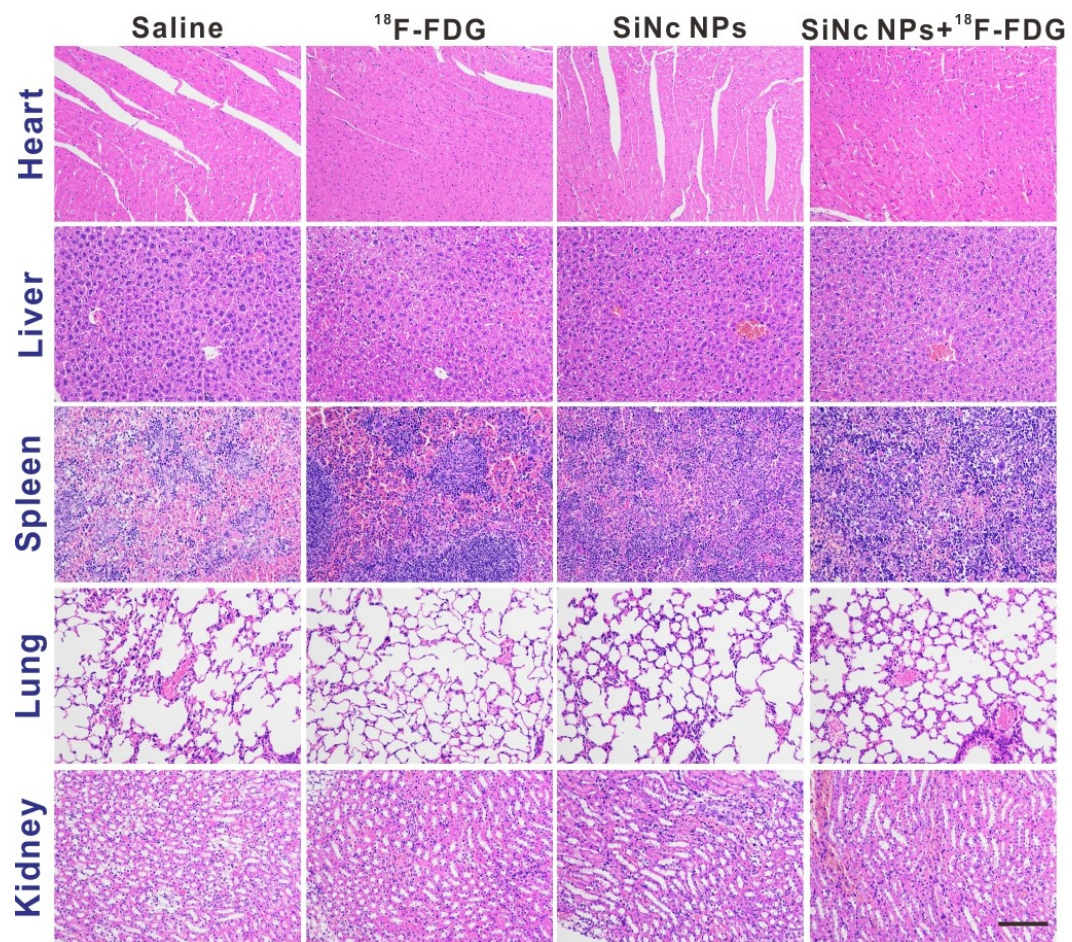

Figure S7: H&E staining images of major health tissues including heart, liver, spleen, lung and kidney of mice in each therapeutic group (Scale bar = 50  $\mu\text{m}$ ).
